# Supplementary material for: Phloem-Mobile MYB44 Negatively Regulates Expression of PHOSPHATE TRANSPORTER 1 in Arabidopsis Roots
Source: Preprints.org preprint supplement (doi:10.20944/preprints202308.1123.v1), 2023-08-15
Supplement: Supplementary file 1 [file supplementary]

Figure S2

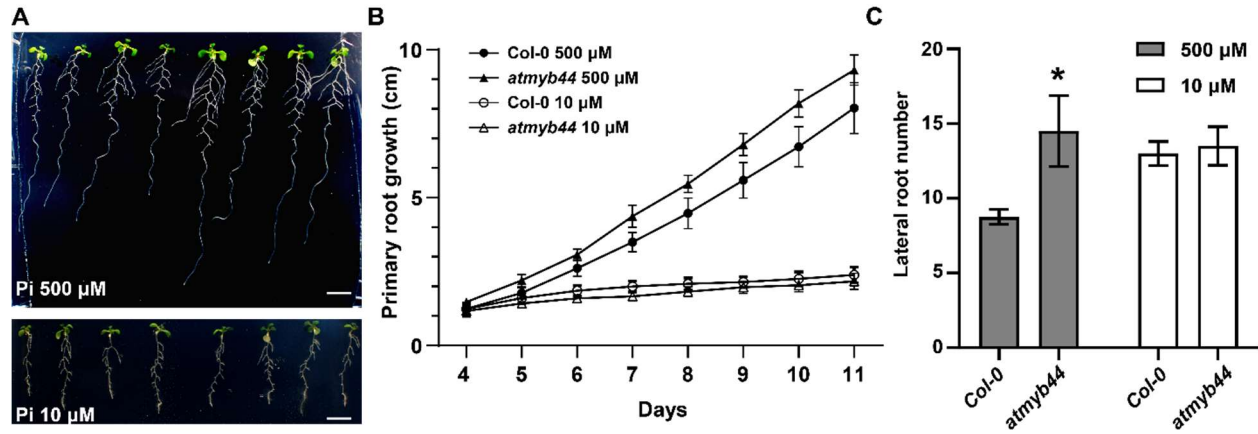

**Figure S2. AtMYB44 is involved in primary and lateral root development.**

(A) *atmyb44* displays enhanced primary root growth under Pi-sufficient (200  $\mu\text{M}$ ) conditions. WT and *atmyb44* were grown on Pi-sufficient (200  $\mu\text{M}$ ) and -starvation (10  $\mu\text{M}$ ) media for 11 days after germination.

(B) Time course measurement of primary root growth in WT and *atmyb44* seedlings.

(C) *atmyb44* shows enhanced lateral root formation under Pi-sufficient (200  $\mu\text{M}$ ) conditions.

Figure S3

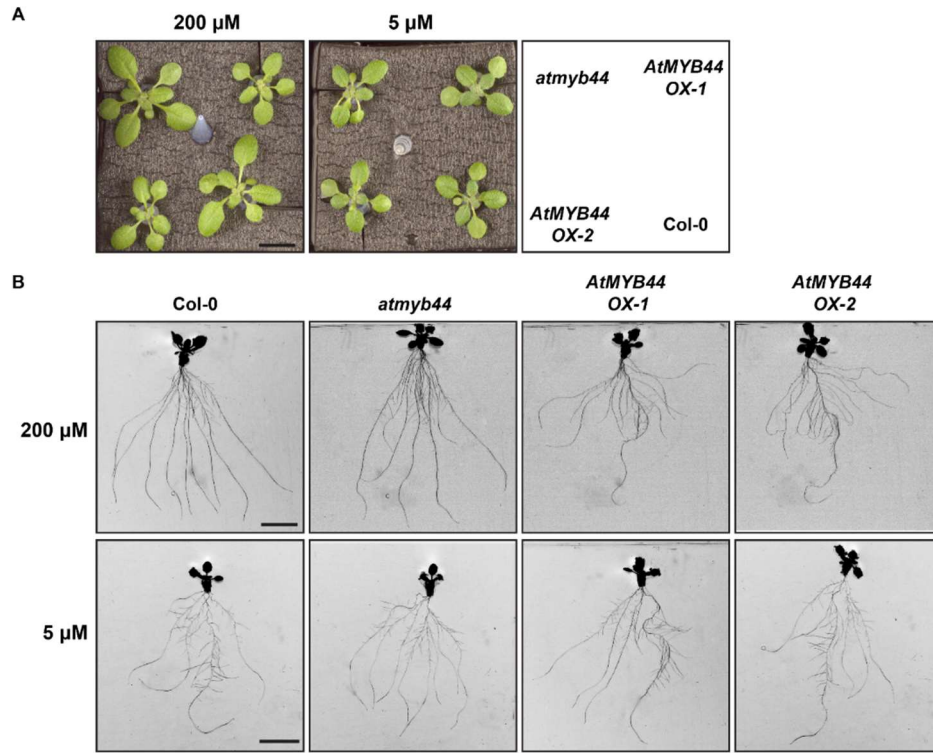

**Figure S3. AtMYB44 serves as a potential negative regulator in shoot and root development.**

Representative shoot (A) and root (B) images of WT, *atmyb44*, *AtMYB44* OX-1 and *AtMYB44* OX-2 plants grown in a hydroponic culture system with Pi-sufficient (200  $\mu$ M, left panel in Figure S3A, upper panel in Figure S3B) and -starvation (5  $\mu$ M, middle panel in Figure S3A, lower panel in Figure S3B) treatment. The right panel of Figure S3A indicates the position of WT, *atmyb44*, *AtMYB44* OX-1 and *AtMYB44* OX-2 plants in the hydroponic culture system. Bar = 1 cm.

**Figure S4**

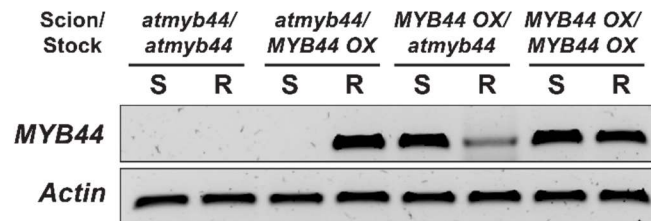

**Figure S4. Mobility of *AtMYB44* mRNA.**

*AtMYB44* is graft-transmissible from the *AtMYB44* OX-1 scion into the *atmyb44* rootstock.

Table S1. List of PCR primers used in this study

| Primer Name     | Oligonucleotide Sequence 5-3' | Target Gene Name |
|-----------------|-------------------------------|------------------|
| 055F_AtACT2     | GAAATCACAGCACTTGCAC           | AtActin2         |
| 055R_AtACT2     | AGCCTTTGATCTTGAGAG            | AtActin2         |
| F_AtMYB44       | TCTCCACCTGTTGTTACTGGGCTT      | AtMYB44          |
| R_AtMYB44       | TTGACTCGTGGCTACGGTTTGACT      | AtMYB44          |
| 060F_AtMYB70    | GGCGACGATTGCACGGCTTC          | AtMYB70          |
| 060R_AtMYB70    | CCATCATACCCTCCATTACCACCG      | AtMYB70          |
| 061F_AtMYB73    | GCAGCGTCGAAGGGCAAAGT          | AtMYB73          |
| 061R_AtMYB73    | CCGATGGACTTCCGGGACTCA         | AtMYB73          |
| 048F_AtMYB77    | TGTCTTCGTCTTCGGAGGAT          | AtMYB77          |
| 048R_AtMYB77    | CCGCCATGTAACTCCTCACT          | AtMYB77          |
| 086F_AtPHT1;4   | TGACGTGGCCAAGACGCAAT          | AtPHT1;4         |
| 086R_AtPHT1;4   | GGCTTTTGTGCGCCTTCCAC          | AtPHT1;4         |
| 088F_proAtMYB44 | CACCAAGATGAAATAGTACTTG        | AtMYB44 promoter |
| 088R_proAtMYB44 | TGATTTTGGAATGTTTATCAAA        | AtMYB44 promoter |
| Ph1-2-F         | GCAACGAAGCCAAGGGTGTC          | AtPHT1;2         |
| Ph1-2-R         | GAAAGCCCCACGGGTCTTCT          | AtPHT1;2         |
