# Supplementary material for: Phloem-Mobile MYB44 Negatively Regulates Expression of PHOSPHATE TRANSPORTER 1 in Arabidopsis Roots
Source: Preprints.org preprint supplement (doi:10.20944/preprints202308.1123.v1), 2023-08-15
Supplement: Supplementary file 2 [file supplementary]

Archive with 2 entries (2 files):
- Supplemental information  (Olukayode et al- Plants).pdf
- Table S2 (Olukayode et al- Plants).xlsx
